# Supplementary material for: Association of Epoxide Hydrolase 2 Gene Arg287Gln with the Risk for Primary Hypertension in Chinese
Source: PubMed Central journal article supplement (PMC7064850; doi:10.1155/2020/2351547), 2020-02-28
Supplement: 2351547.f1.pdf [file 2351547.f1.pdf]

**Supplementary Figure 1.** Propensity score graph after matching age, sex, body mass index and total cholesterol.

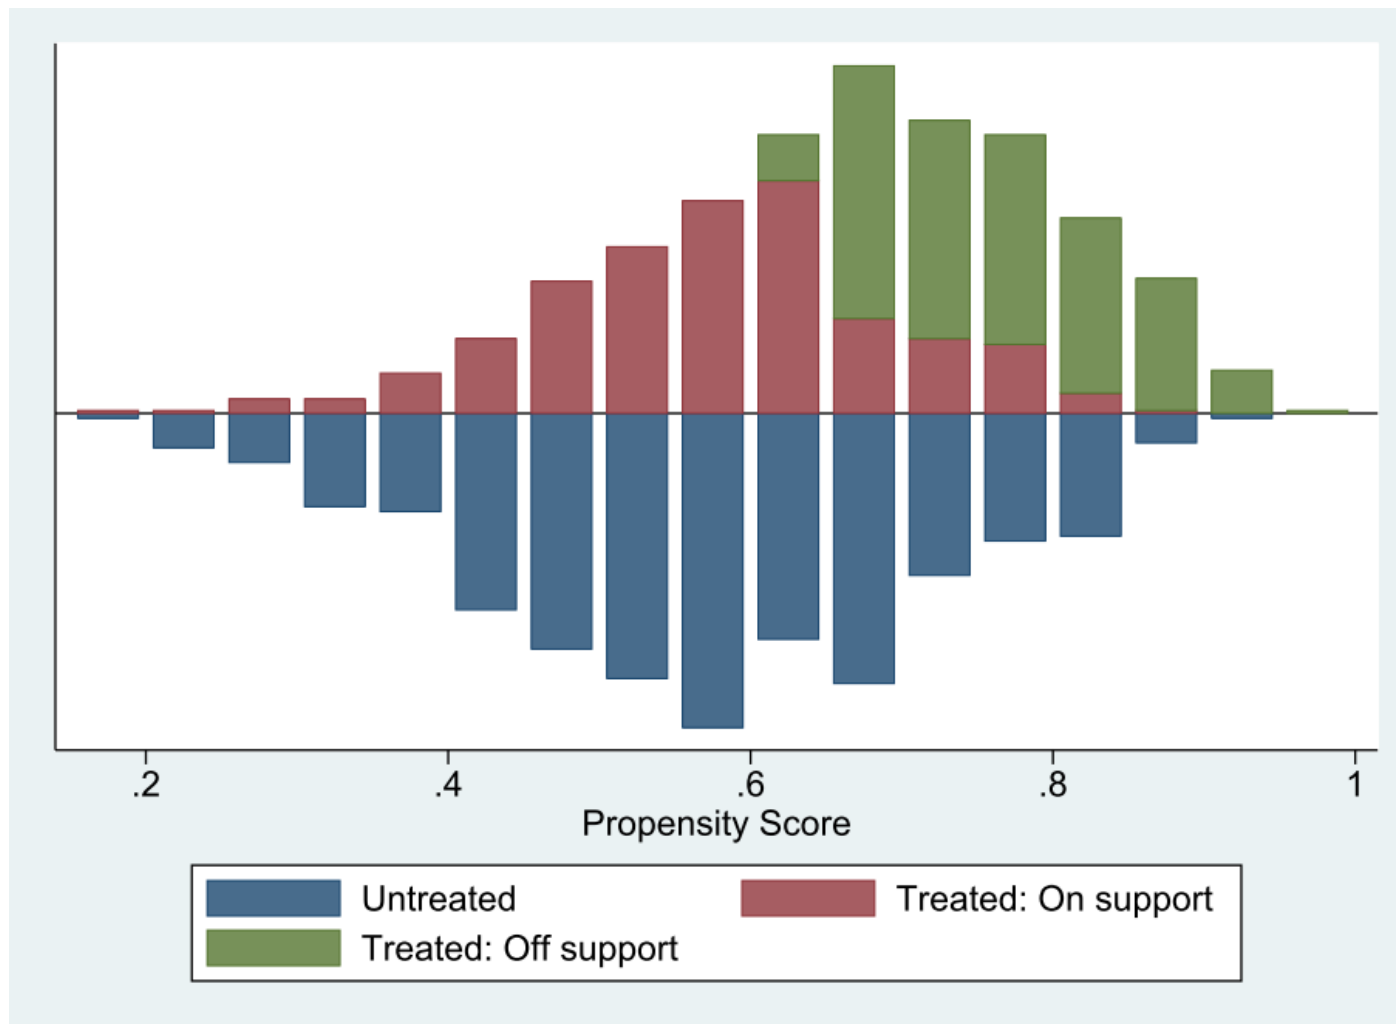

**Supplementary Table 1.** The genotype and allele distributions of polymorphism rs751141 between cases and controls, as well as its risk prediction for hypertension risk after using propensity score matching method.

| rs751141 | Cases        | Controls     | P     | OR (95% CI) P           | Model     | OR (95% CI) P           |
|----------|--------------|--------------|-------|-------------------------|-----------|-------------------------|
| Genotype |              |              |       |                         |           |                         |
| GG       | 256 (63.68%) | 213 (53.12%) |       | Reference               | Additive  | 0.72 (0.57, 0.90) 0.004 |
| GA       | 122 (30.35%) | 155 (38.65%) | 0.010 | 0.65 (0.49, 0.88) 0.006 | Dominant  | 0.65 (0.49, 0.86) 0.002 |
| AA       | 24 (5.97%)   | 33 (8.23%)   |       | 0.61 (0.34, 1.06) 0.077 | Recessive | 0.71 (0.41, 1.22) 0.214 |
| Allele   |              |              |       |                         |           |                         |
| G        | 634 (78.86%) | 581 (72.44%) | 0.003 | Reference               |           |                         |
| A        | 170 (21.14%) | 221 (27.56%) |       | 0.70 (0.56, 0.89) 0.003 |           |                         |

Abbreviations: OR, odds ratio; 95% CI, 95% confidence interval.
